# Supplementary material
Source: PubMed Central journal article supplement (PMC2329683)
Supplement: 0801447105_Supplemental_PDF.pdf [file 0801447105_Supplemental_PDF.pdf]

# Supporting Information

Taoufik *et al.* 10.1073/pnas.0801447105

**Table S1. Genes differentially expressed in WT and TNFRI KO nonoccluded brain tissue**

| Function                                                                                                     | Accession no. | Fold change |
|--------------------------------------------------------------------------------------------------------------|---------------|-------------|
| <b>Cell death</b>                                                                                            |               |             |
| Survival motor neuron                                                                                        | U77714        | -8.66       |
| BH3 interacting (with BCL2 family) domain, apoptosis agonist                                                 | D83698        | 5.96        |
| <b>Signaling</b>                                                                                             |               |             |
| v-abl Abelson murine leukemia oncogene 1                                                                     | L10656        | -6.93       |
| Chemokine-like receptor 1                                                                                    | U79525        | -6.48       |
| Estrogen related receptor, $\alpha$                                                                          | U85259        | 5.73        |
| 5-Hydroxytryptamine (serotonin) receptor 1B                                                                  | Z11597        | 6.19        |
| Androgen receptor                                                                                            | X53779        | 6.22        |
| <b>Cytoskeleton</b>                                                                                          |               |             |
| Sequestosome 1                                                                                               | U40930        | -6.36       |
| Cortactin                                                                                                    | U03184        | 5.68        |
| Actin, $\beta$ , cytoplasmic                                                                                 | M12481        | 11.69       |
| Laminin, $\alpha$ 5                                                                                          | U37501        | 15.47       |
| <b>Ion transporters</b>                                                                                      |               |             |
| Potassium large conductance calcium-activated channel, subfamily M, $\beta$ member 1                         | AF020711      | -12.06      |
| Solute carrier family 16 (monocarboxylic acid transporters), member 1                                        | AF058055      | -6.14       |
| ATPase, Ca <sup>++</sup> transporting, plasma membrane 2                                                     | AF053471      | -6.07       |
| Potassium voltage-gated channel, subfamily H (eag-related), member 1                                         | U04294        | -6.06       |
| Solute carrier family 6 (neurotransmitter transporter, serotonin), member 4                                  | AF013604      | -5.45       |
| ATP-binding cassette, sub-family G (WHITE), member 1                                                         | U34920        | -5.22       |
| Friedreich ataxia                                                                                            | U95736        | 5.79        |
| <b>Metabolism</b>                                                                                            |               |             |
| Prostaglandin I2 (prostacyclin) synthase                                                                     | AB001607      | -6.81       |
| Tryptophan hydroxylase                                                                                       | J04758        | -6.43       |
| Fatty acid amide hydrolase                                                                                   | U82536        | -5.84       |
| Proprotein convertase subtilisin/kexin type 1                                                                | M58589        | -5.47       |
| Serine (or cysteine) proteinase inhibitor, clade E (nexin, plasminogen activator inhibitor type 1), member 1 | M33960        | 5.16        |
| Hypoxanthine guanine phosphoribosyl transferase                                                              | J00423        | 5.81        |
| Plasminogen                                                                                                  | J04766        | 6.82        |
| Ubiquitin B                                                                                                  | X51703        | 7.47        |
| Tyrosine 3-monooxygenase/tryptophan 5-monooxygenase activation protein, zeta polypeptide                     | D78647        | 7.64        |
| Serine (or cysteine) proteinase inhibitor, clade B (ovalbumin), member 2                                     | X16490        | 7.87        |
| <b>Stress response</b>                                                                                       |               |             |
| Heat shock protein, 84 kDa 1                                                                                 | M36829        | -5.78       |
| <b>Transcription/translation</b>                                                                             |               |             |
| Nuclear DNA-binding protein                                                                                  | AF031426      | -16.77      |
| NK2 transcription factor related, locus 2 (Drosophila)                                                       | U31566        | -5.63       |
| Iroquois related homeobox 3 (Drosophila)                                                                     | Y15001        | -5.42       |
| fos-like antigen 2                                                                                           | X83971        | -5.34       |
| Ribosomal protein S29                                                                                        | L31609        | 12.42       |

This list of genes shows those with transcripts that were different by  $\geq 2$ -fold in TNFRI KO compared with WT. The genes have been grouped according to known functions (i.e., Entrez definition).

**Table S2. Genes differentially expressed in WT and TNFRI KO lesions 3 h after pMCAO**

| Function                                              | Accession no. | Fold change |
|-------------------------------------------------------|---------------|-------------|
| <b>Signaling</b>                                      |               |             |
| Adenomatosis polyposis coli                           | M88127        | -2.06       |
| raf-related oncogene                                  | M13071        | -2.13       |
| abl proto-oncogene                                    | L10656        | -2.18       |
| DnaJ-like protein 1                                   | L16953        | -2.65       |
| Multidrug resistance protein 1                        | M14757        | -3.20       |
| Serine/arginine-rich protein specific kinase 2        | U92456        | -2.64       |
| Protein tyrosine kinase 6                             | U16805        | -2.05       |
| Protein kinase C inhibitor protein 1, zeta            | D78647        | -2.52       |
| Protein kinase C inhibitor protein 1, eta             | U57311        | 2.19        |
| TRAF family member-associated Nf-kappa B activator    | U51907        | 2.03        |
| Presenilin 2                                          | U57324        | 3.11        |
| Tumor necrosis factor receptor superfamily, member 1b | M59378        | 2.24        |
| <b>Transcription/translation</b>                      |               |             |
| ELK1, member of ETS oncogene family                   | X87257        | -3.14       |
| fos-like antigen 2 (Fra-2)                            | X83971        | -3.35       |
| DNA polymerase delta 1, catalytic domain              | Z21848        | 2.55        |
| Thyroid autoantigen 70 kDa                            | M38700        | 3.56        |
| CCCTC-binding factor                                  | U51037        | 2.12        |
| Est2 repressor factor                                 | U58533        | 2.02        |
| <b>Cell cycle</b>                                     |               |             |
| Cyclin-dependent kinase inhibitor 2C                  | U19596        | -2.31       |
| <b>Development/differentiation</b>                    |               |             |
| Myeloblastosis oncogene-like 1                        | X82327        | -2.58       |
| Gli oncogene; zinc finger transcription factor        | S65038        | -2.09       |
| Eph receptor B4                                       | Z49085        | -2.47       |
| Eph receptor B2                                       | L25890        | -2.93       |
| Transferrin receptor                                  | X57349        | 2.07        |
| Clusterin                                             | L08235        | 2.40        |
| <b>Growth factors</b>                                 |               |             |
| Thrombopoietin receptor                               | Z22649        | -2.02       |
| Angiotensin converting enzyme                         | J04946        | -2.13       |
| Insulin-like growth factor binding protein 1          | X81579        | -2.41       |
| Neuroleukin                                           | M14220        | 2.21        |
| MAD homolog 2 (Drosophila) (SMAD 2)                   | U60530        | 2.39        |
| <b>Cytoskeleton</b>                                   |               |             |
| Heat shock protein, 25 kDa                            | U03560        | -2.09       |
| Keratin complex 1, acidic, gene 18                    | M11686        | 3.12        |
| <b>Metabolism</b>                                     |               |             |
| Calcium-binding protein, intestinal                   | J05186        | -2.27       |
| Glutathione S-transferase, mu 2                       | J04696        | 2.38        |
| Glutathione S-transferase, theta 1                    | X98055        | -2.20       |
| Ubiquitin B                                           | X51703        | -2.18       |
| Glutathione peroxidase 3                              | U13705        | 2.22        |
| Glutathione S-transferase, alpha 2 (Yc2)              | J03958        | 2.14        |
| <b>Cell death</b>                                     |               |             |
| Neuronal death protein DP5                            | D83698        | 2.64        |
| Bcl-associated death promoter (BAD)                   | L37296        | 2.10        |
| Defender against cell death 1                         | U83628        | 3.03        |
| Adenosine A1 receptor                                 | U05671        | 3.29        |
| Fas antigen                                           | U39643        | 2.09        |
| Programmed cell death 1                               | X67914        | 2.15        |
| CASP8 and FADD-like apoptosis regulator               | U97076        | 2.48        |
| Adenosine A2a receptor                                | U05672        | -3.19       |
| BH3 interacting domain death agonist                  | U75506        | -3.08       |
| <b>DNA repair</b>                                     |               |             |
| Excision repair 1                                     | X07414        | 2.33        |
| DNA excision repair protein ERCC-5                    | D16306        | 3.30        |
| RAD23b homolog (S. cerevisiae)                        | X92411        | 2.44        |
| Translin                                              | X81464        | 2.26        |

This is a list of genes with transcripts that were different by at least 2-fold between WT and TNFRI KO pMCAO. The genes have been grouped accordingly to known functions (i.e., Entrez definition).

**Table S3. Genes differentially expressed in WT and TNFRI KO lesions 6 h after pMCAO**

| Function                                                  | Accession no. | Fold change |
|-----------------------------------------------------------|---------------|-------------|
| <b>Signaling</b>                                          |               |             |
| Adenomatosis polyposis coli                               | M88127        | 2.32        |
| Lymphocyte protein tyrosine kinase                        | M12056        | 2.60        |
| Harvey rat sarcoma virus oncogene                         | Z50013        | 2.60        |
| Neurofibromatosis 2                                       | L27105        | 3.70        |
| Jun oncogene                                              | J04115        | 3.30        |
| Map3k8                                                    | D13759        | 6.06        |
| Transcription factor RelB                                 | M83380        | 3.00        |
| GTP-binding protein                                       | U10551        | 16.73       |
| Promyelocytic leukemia                                    | U33626        | 3.13        |
| Hemopoietic cell kinase                                   | Y00487        | 2.69        |
| DnaJ-like protein 1                                       | U28423        | 2.24        |
| Zinc finger protein 36                                    | M57422        | 2.17        |
| Protein tyrosine phosphatase, receptor type, G            | L09562        | 2.72        |
| Heat shock 70-kD protein 5                                | D78645        | 3.35        |
| NF- $\kappa$ B inhibitor $\beta$                          | U19799        | 2.47        |
| Plasminogen activator inhibitor, type I                   | M33960        | 2.18        |
| IL-12b                                                    | M86671        | -2.53       |
| Tumor susceptibility gene 101                             | U52945        | -2.29       |
| T-cell lymphoma invasion and metastasis 1                 | U05245        | -2.18       |
| MAPK kinase 4                                             | U18310        | -2.38       |
| Lysosomal-associated protein transmembrane 4A             | U34259        | -2.52       |
| MAPK kinase 6                                             | X97052        | -2.01       |
| PKC, $\alpha$                                             | M25811        | -2.11       |
| PKC, $\beta$                                              | X53532        | -2.18       |
| I-TRAF                                                    | U51907        | -2.03       |
| Tnf receptor-associated factor 3                          | U21050        | -5.23       |
| CD22 antigen                                              | L16928        | -2.56       |
| CD152 antigen                                             | X05719        | -2.06       |
| Selectin, platelet (p-selectin) ligand                    | X91144        | -2.02       |
| <b>Growth factors</b>                                     |               |             |
| Colony-stimulating factor 1 receptor                      | X68932        | -2.37       |
| Erythropoietin receptor                                   | J04843        | -2.75       |
| Insulin receptor substrate 1                              | L24563        | -2.93       |
| Fibroblast growth factor receptor 1                       | M28998        | -2.71       |
| GM-CSF-R- $\alpha$                                        | M85078        | -2.41       |
| Corticotropin-releasing hormone receptor                  | X72305        | -4.66       |
| Insulin-like growth factor 1                              | X04480        | -2.46       |
| Myosin light chain, alkali, nonmuscle                     | U04443        | -2.14       |
| Small inducible cytokine A4                               | M35590        | -2.67       |
| Epidermal growth factor                                   | L21671        | -4.48       |
| Vascular endothelial growth factor                        | M95200        | -5.06       |
| Nerve growth factor, $\alpha$                             | M11434        | -3.32       |
| Tyrosine kinase receptor 1                                | X80764        | 5.20        |
| Plasminogen activator, urokinase                          | X02389        | 2.56        |
| Small inducible cytokine subfamily, member 2              | X53798        | 3.04        |
| Neuroleukin                                               | M14220        | 2.06        |
| Glial cell line derived neurotrophic factor               | D49921        | 2.35        |
| <b>Cell cycle</b>                                         |               |             |
| Cell division cycle 2 homolog ( <i>S. pombe</i> )-like 1  | M58633        | 3.82        |
| Cyclin-dependent kinase inhibitor 1A (P21)                | U09507        | 2.31        |
| Cell division cycle 25 homolog A ( <i>S. cerevisiae</i> ) | U27323        | 2.72        |
| Cyclin G                                                  | Z37110        | 2.66        |
| Retinoblastoma 1                                          | M26391        | 2.76        |
| Wee 1 homolog ( <i>S. pombe</i> )                         | D30743        | -2.13       |
| <b>Development/differentiation</b>                        |               |             |
| Fyn proto-oncogene                                        | U70324        | 2.14        |
| Engrailed 1                                               | L12703        | 2.07        |

**Table S3. Continued**

| Function                                            | Accession no. | Fold change |
|-----------------------------------------------------|---------------|-------------|
| Leukemia inhibitory factor                          | D26177        | 2.79        |
| POU domain, class 3, transcription factor 1         | X56959        | -2.03       |
| Paired box gene 6 (Pax6)                            | X63963        | -2.12       |
| Stromal cell-derived factor 1 receptor              | D87747        | -3.68       |
| Homeo box B5                                        | M26283        | -2.57       |
| Kruppel-like factor 3 (basic)                       | U36340        | -2.23       |
| Growth differentiation factor 9 (BMP15)             | X77113        | -2.18       |
| Tissue inhibitor of metalloproteinase 3             | L19622        | -3.11       |
| Thrombopoietin                                      | L34169        | -2.34       |
| Cathepsin B                                         | M14222        | -2.38       |
| Cathepsin D                                         | X53337        | 3.12        |
| Follistatin                                         | Z29532        | 2.72        |
| <b>Cell death</b>                                   |               |             |
| Defender against cell death 1                       | U83628        | 32.22       |
| BCL2-binding athanogene 1 (BAG1)                    | U17162        | -2.30       |
| <b>DNA repair</b>                                   |               |             |
| Ligase I, DNA, ATP-dependent                        | U04674        | -2.83       |
| Translin                                            | X81464        | -2.02       |
| Protein tyrosine kinase 6                           | U16805        | -2.05       |
| <b>Transcription/translation</b>                    |               |             |
| Transcription factor MTF-1                          | X71327        | 2.34        |
| POU domain, class 2, associating factor 1           | U43788        | 2.27        |
| Kruppel-like factor 4 (gut)                         | U20344        | 9.99        |
| Zinc finger protein, subfamily 1A, 1 (Ikaros)       | L03547        | 2.75        |
| Nuclease sensitive element binding protein 1        | X57621        | 2.71        |
| Activating transcription factor 3                   | U19118        | 2.04        |
| Transcription factor UBF                            | X60831        | -2.26       |
| <b>Neuronal function</b>                            |               |             |
| 5-hydroxytryptamine (serotonin) receptor 2C         | X72230        | -3.66       |
| 5-hydroxytryptamine (serotonin) receptor 1E $\beta$ | Z14224        | -2.15       |
| Glutamate receptor, ionotropic, AMPA1 ( $\alpha$ 1) | X57497        | -2.14       |
| <b>Cytoskeleton</b>                                 |               |             |
| Keratin complex 2, basic, gene 1                    | M10937        | -2.09       |
| Myosin lb                                           | L00923        | -2.99       |
| Myosin light chain, alkali, cardiac atria           | M19436        | 2.20        |

This is a list of genes with transcripts that were different by at least 2-fold between WT and TNFRI KO pMCAO. The genes have been grouped accordingly to known functions (i.e., Entrez definition).
